# Supplementary material
Source: PubMed Central journal article supplement (PMC10193529)
Supplement: NIHMS1893322-supplement-1.pdf [file NIHMS1893322-supplement-1.pdf]

## SUPPLEMENTAL INFORMATION

**Table S1: CyCIF Antibody Information (Related to Figure 1)**

| Target Name    | Source                    | Identifier                                            |
|----------------|---------------------------|-------------------------------------------------------|
| TTF1           | Abcam                     | Clone EPR5955(2); Cat# ab206726; RRID: AB_2857980     |
| B220 (CD45R)   | ThermoFisher Scientific   | Clone RA3-6B2; Cat# 41-0452-80; RRID: AB_2573598      |
| CD45           | BioLegend                 | Clone 30-F11; Cat# 103123; RRID: AB_493534            |
| FOXP3          | ThermoFisher Scientific   | Clone FJK-16s; Cat# 11-5773-82; RRID: AB_465243       |
| CD4            | ThermoFisher Scientific   | Clone 4SM95; Cat# 41-9766-82; RRID: AB_2573637        |
| CD8 $\alpha$ * | Cell Signaling Technology | Clone D4W2Z; Cat# 98941; RRID: AB_2756376             |
| CD103**        | R&D Systems               | Clone Polyclonal; Cat# AF1990; RRID: AB_2128618       |
| CD11c*         | Cell Signaling Technology | Clone D1V9Y; Cat# 97585; RRID: AB_2800282             |
| CD11b          | Abcam                     | Clone EPR1344; Cat# ab204471; RRID: AB_2650514        |
| Nkp46          | R&D Systems               | Clone Polyclonal; Cat# FAB2225F-025; RRID: AB_2149149 |
| CD3e*          | Cell Signaling Technology | Clone D4V8L; Cat# 99940; RRID: AB_2755035             |
| Ki-67          | Cell Signaling Technology | Clone D3B5; Cat# 12075; RRID: AB_2728830              |
| PD-L1*         | Cell Signaling Technology | Clone D5V3B; Cat# 64988; RRID: AB_2799672             |
| PD-1           | Cell Signaling Technology | Clone D7D5W; Cat# 61237; RRID: AB_2799604             |
| Granzyme B*    | Cell Signaling Technology | Clone E5V2L; Cat# 44153; RRID: AB_2857976             |
| Perforin*      | Cell Signaling Technology | Clone E3W4I; Cat# 31647; RRID: AB_2857978             |
| TIM-3*         | Cell Signaling Technology | Clone D3M9R; Cat# 83882; RRID: AB_2800033             |
| Ly6G           | eBioscience               | Clone 1A8-Ly6G; Cat#: 12-9668-82; RRID: AB_2572720    |
| TCF1           | Cell Signaling Technology | Clone C63D9; Cat# 6709; RRID: AB_2797631              |
| Vimentin       | Cell Signaling Technology | Clone D21H3; Cat# 9854; RRID: AB_10829352             |
| $\alpha$ SMA   | Cell Signaling Technology | Clone D4K9N; Cat# 76113; RRID: AB_2857972             |
| F4/80*         | Cell Signaling Technology | Clone D2S9R; Cat# 70076; RRID: AB_2799771             |

|              |                           |                                                     |
|--------------|---------------------------|-----------------------------------------------------|
| Pan-Keratin  | ThermoFisher Scientific   | Clone AE1/AE3; Cat# 53-9003-82; RRID: AB_1834350    |
| PCNA         | Abcam                     | Clone PC10; Cat# ab201674; RRID: AB_2857977         |
| CD4          | R&D                       | Clone Polyclonal; Cat# FAB8165G; RRID: AB_2728839   |
| CCR6         | Abcam                     | Clone EPR22259; Cat# ab243852; RRID: AB_2860033     |
| Granzyme B   | Agilent Dako              | Clone GrB-7; Cat# M7235; RRID: AB_2114697           |
| TCF1         | Cell Signaling Technology | Clone C63D9; Cat# 6444; RRID: AB_2797627            |
| FOXP3        | eBioscience               | Clone 236A/E7; Cat# 41-4777-82; RRID: AB_2573609    |
| CD8 $\alpha$ | eBioscience               | Clone AMC908; Cat# 50-0008-82; RRID: AB_2574149     |
| PD-L1        | Cell Signaling Technology | Clone E1L3N; Cat# 14123; RRID: AB_2798397           |
| CD20         | eBioscience               | Clone L26; Cat# 50-0202-82; RRID: AB_11150959       |
| TIM-3        | Cell Signaling Technology | Clone D5D5R; Cat# 54669; RRID: AB_2799468           |
| CD45         | BioLegend                 | Clone HI30; Cat# 304008; RRID: AB_314396            |
| PD-1         | Abcam                     | Clone EPR4877(2); Cat# ab201825; RRID: AB_2728811   |
| CD163        | Abcam                     | Clone EPR14643-36; Cat# ab218293; RRID: AB_2889155  |
| CD68         | Cell Signaling Technology | Clone D4B9C; Cat# 79594; RRID: AB_2799935           |
| Ki-67        | Cell Signaling Technology | Clone D3B5; Cat# 12075; RRID: AB_2728830            |
| HLA-DPB1     | Abcam                     | Clone EPR11226; Cat# ab201527; RRID: AB_2890211     |
| CD3D         | Abcam                     | Clone EP4426; Cat# ab208514; RRID: AB_2728789       |
| HLA A        | Abcam                     | Clone EP1395Y; Cat# ab199837; RRID: AB_2728798      |
| PCNA         | Cell Signaling Technology | Clone PC10; Cat# 8580; RRID: AB_11178664            |
| $\alpha$ SMA | Abcam                     | Clone EPR5368; Cat# ab202509; RRID: AB_2868435      |
| Vimentin     | Cell Signaling Technology | Clone D21H3; Cat# 9856; RRID: AB_10834530           |
| CD16         | Santa Cruz                | Clone DJ130c; Cat# sc-20052 AF488; RRID: AB_2890161 |
| Pan-Keratin  | eBioscience               | Clone AE1/AE3; Cat# 41-9003-82; RRID: AB_11218704   |
| CD14         | Abcam                     | Clone EPR3653; Cat# ab196169; RRID: AB_2890135      |
| CD19         | Abcam                     | Clone EPR5906; Cat# ab196468; RRID: AB_2889156      |
| CD103        | Abcam                     | Clone EPR4166(2); Cat# ab225153; RRID: AB_2884945   |

\*Custom Conjugated Antibody from Cell Signaling Technology

\*\*In-House Conjugated

See Star Methods for labeling details.

Figure S1

A

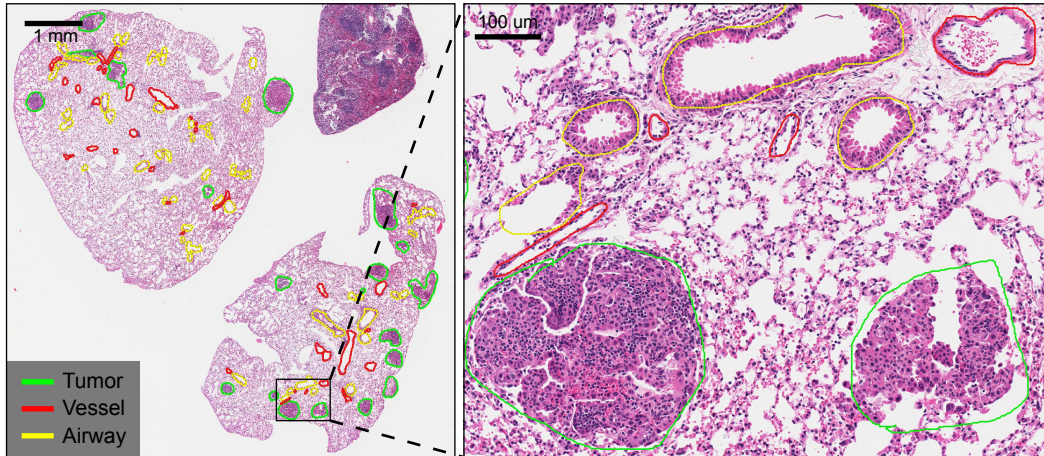

B

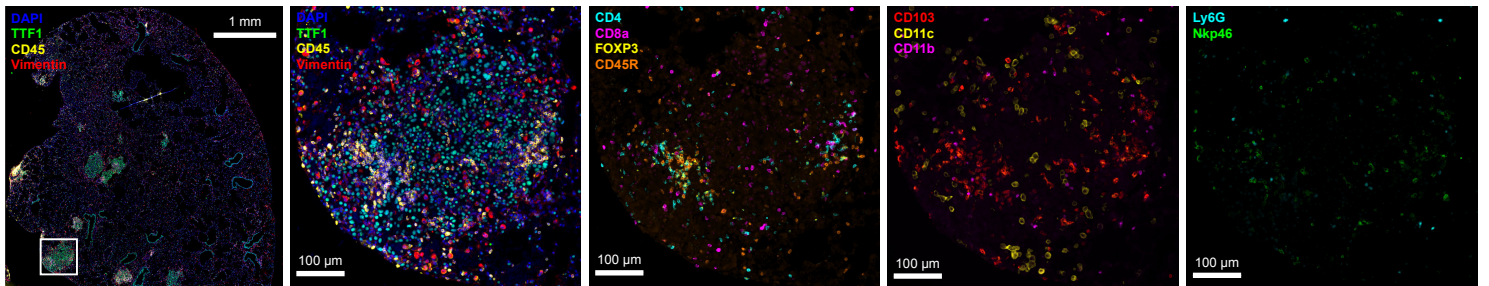

C

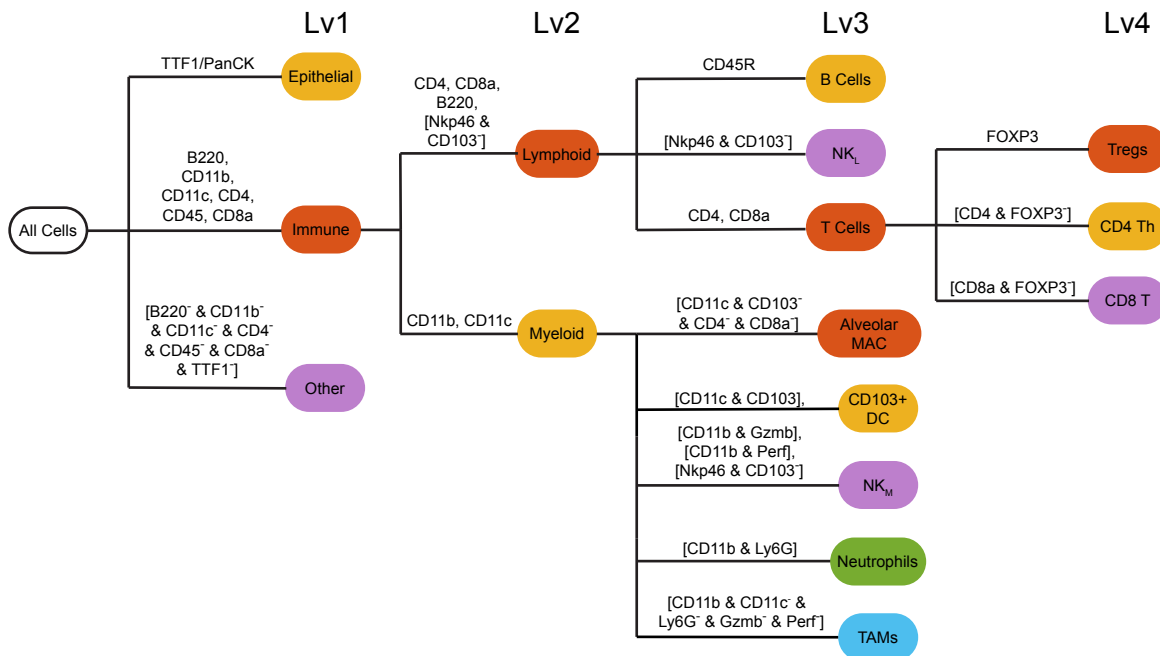

**Figure S1. Multiplexed tissue imaging and cell type calling in the KP genetically engineered mouse model of cancer (Related to Figures 1 and 2)**

(A) Representative image of H&E-stained section with pathology annotations indicated. Left, Scale bar: 1mm. Right, Scale bar: 100 $\mu$ m. (B) Representative multiplexed CyCIF images (whole lung lobe and single tumor inset) of tumor and immune markers from whole FFPE sections of KP LucOS tumor-bearing lung. Scalebar:1mm. Scalebar: 100  $\mu$ m. Left, Scale bar: 1mm. Right, Scale bar: 100 $\mu$ m. (C) Cell type calling dendrogram for CyCIF image analysis; first immune, epithelial, and 'other' cell types were identified (Level 1, Lv1; shown in heat map of all cells), and then the immune cells were further clustered into lymphoid cells and myeloid cells (Level 2; Lv 2) and immune cell subtypes (Level 3 and Level 4; Lv3, Lv4: Treg, CD4 Th, CD8 Tc, B cells, NK cells (lymphoid marker-defined, 'NK-L'), alveolar macrophages, dendritic cells, NK cells (myeloid marker-defined, 'NK-M'), neutrophils, and tumor associated macrophages (CD11b<sup>+</sup>CD11c<sup>-</sup>).

**Table S2: Mouse Experiment Information (Related to Figure 2-6)**

| Expt # | Mouse                      | Viral Construct | Sac Week | Treatment     | # mice | Lobes | Tumors  | Imaging modality |
|--------|----------------------------|-----------------|----------|---------------|--------|-------|---------|------------------|
| 1      | KrasLSL-G12D/+; Trp53fl/fl | Cre             | 8        | none          | 5      | 10    | 531     | CyCIF            |
| 1      | KrasLSL-G12D/+; Trp53fl/fl | LucOS           | 8        | none          | 5      | 10    | 107     | CyCIF            |
| 1      | KrasLSL-G12D/+; Trp53fl/fl | Cre+Cxcl10a     | 8        | none          | 5      | 10    | 447     | CyCIF            |
| 2      | KrasLSL-G12D/+; Trp53fl/fl | Cre             | 8        | none          | 5      | 8     | 599     | RNAScope         |
| 2      | KrasLSL-G12D/+; Trp53fl/fl | LucOS           | 8        | none          | 5      | 8     | 113     | RNAScope         |
| 2      | KrasLSL-G12D/+; Trp53fl/fl | Cre+Cxcl10a     | 8        | none          | 5      | 8     | 515     | RNAScope         |
| 3      | KrasLSL-G12D/+; Trp53fl/fl | LucOS           | 6        | Ctrl 6 weeks  | 6      | 18    | 107     | CyCIF            |
| 3      | KrasLSL-G12D/+; Trp53fl/fl | LucOS           | 9        | Ctrl 9 weeks  | 6      | 18    | 239     | CyCIF            |
| 3      | KrasLSL-G12D/+; Trp53fl/fl | LucOS           | 9        | ICB 9 weeks   | 6      | 18    | 324     | CyCIF            |
| 4      | KrasLSL-G12D/+; Trp53fl/fl | LucOS           | 9        | PBS (control) | 7      | 14    | 198     | CyCIF            |
| 4      | KrasLSL-G12D/+; Trp53fl/fl | LucOS           | 9        | Vax           | 8      | 16    | 201     | CyCIF            |
| 5      | Trp53fl/fl                 | Cre             | 4        | none          | 3      | 3     | 0 (n/a) | CyCIF            |
| 5      | Trp53fl/fl                 | LucOS           | 4        | none          | 3      | 3     | 0 (n/a) | CyCIF            |
| 5      | Trp53fl/fl                 | Cre             | 8        | none          | 2      | 2     | 0 (n/a) | CyCIF            |
| 5      | Trp53fl/fl                 | LucOS           | 8        | none          | 3      | 3     | 0 (n/a) | CyCIF            |

# Figure S2

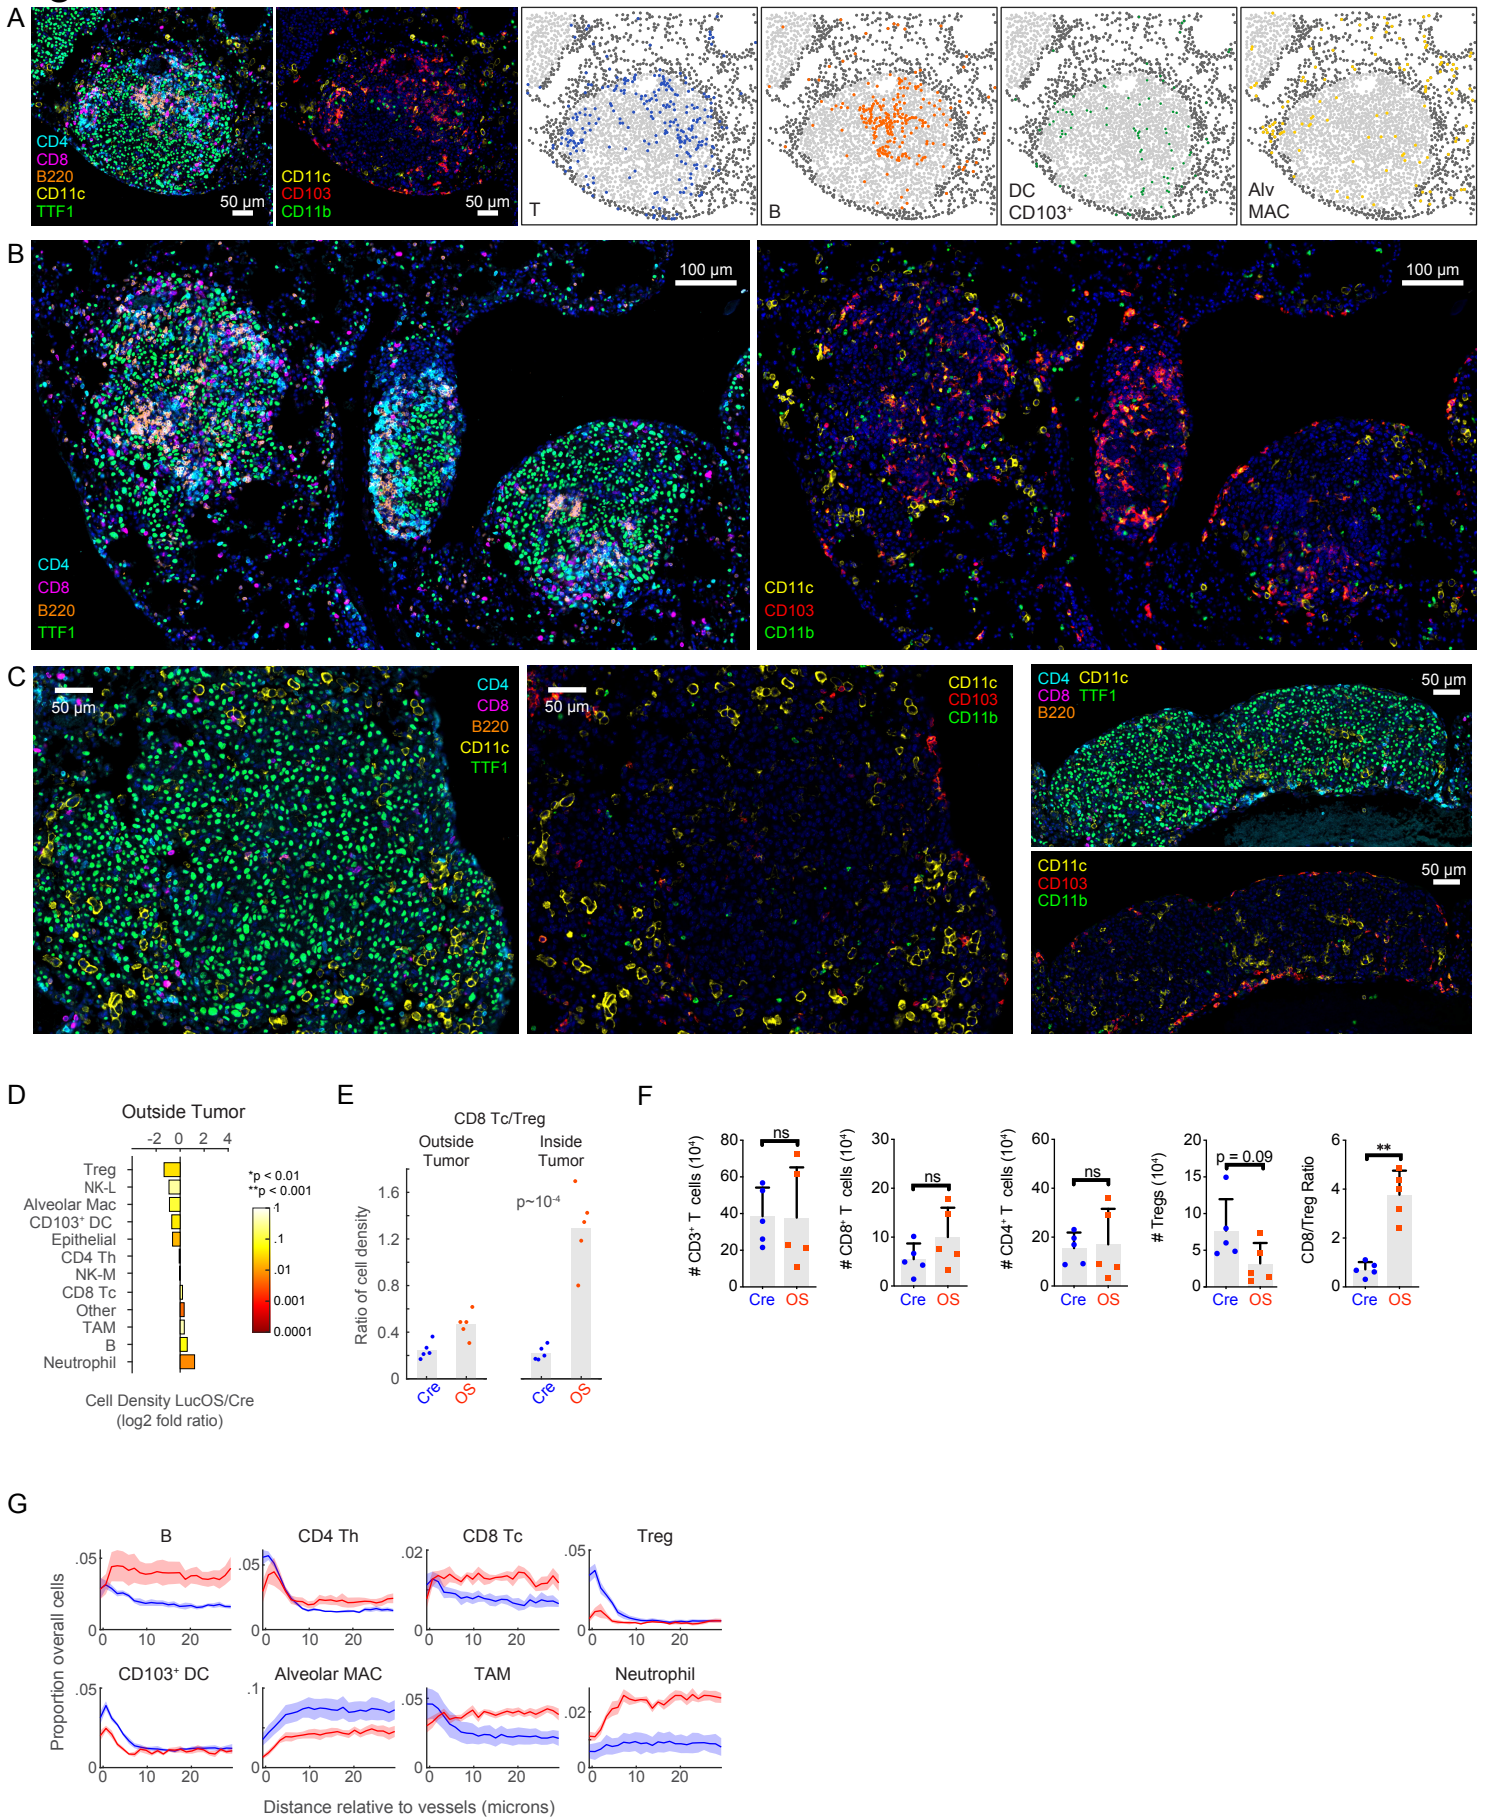

**Figure S2. Spatial analysis of immune cell-type composition in KP LucOS versus Cre tumor-bearing lung (Related to Figure 2)**

(A) Representative CyCIF images of KP LucOS tumor shown in Figure 2B, showing co-expression patterns of myeloid markers CD11c, CD103, and CD11b. In the cell type dendrogram (Figure S1C) alveolar macrophages are defined as CD11c<sup>+</sup> cells that are negative for the conventional type 1 dendritic cell (cDC1) marker CD103 and having no appreciable expression of CD11b. The cDC1 population identified is CD11c<sup>+</sup> CD11b<sup>-</sup> CD103<sup>+</sup>. The high level CD11c<sup>+</sup> CD11b<sup>+</sup> “myeloid” gate also captured CD11b<sup>+</sup> CD11c<sup>+</sup> conventional type 2 dendritic cells (cDC2), but this cell population could not be distinguished from CD11b<sup>+</sup> CD11c<sup>+</sup> tumor associated macrophages (TAMs), and, thus, was not described as an individual subset. Spatial maps of cell types (four plots on right) show that the CD11c<sup>+</sup> cells depicted in Figure 2B are alveolar macrophages and not dendritic cells. Alveolar macrophages express high levels of CD11c and are the most abundant myeloid population in the lung. Scale bar: 50µm. Additional representative CyCIF images of lymphocyte and myeloid markers are shown for (B) KP LucOS (Scale bar: 100µm) and (C) KP Cre (Scale bar: 50µm). (D) Log<sub>2</sub> fold ratio of cell-type densities between LucOS and Cre in areas outside tumor (n = 5 mice/group, color: two tailed t-test p-value). (E) Ratio of CD8 Tc to Treg cell density measurements outside and inside of annotated tumor areas in LucOS versus Cre mice (n = 5 mice/group, bar = mean, two-tailed t-test). (F) T cell numbers in LucOS versus Cre mice calculated by flow cytometric analysis of dissociated tumor-bearing lung tissue (n = 5 mice/group, bar = mean, two-tailed t-test ns p<0.1). (G) Spatial frequency of indicated cell types relative to vessels (Cre and LucOS, n = 5 mice/group, mean +/- SEM).

# Figure S3

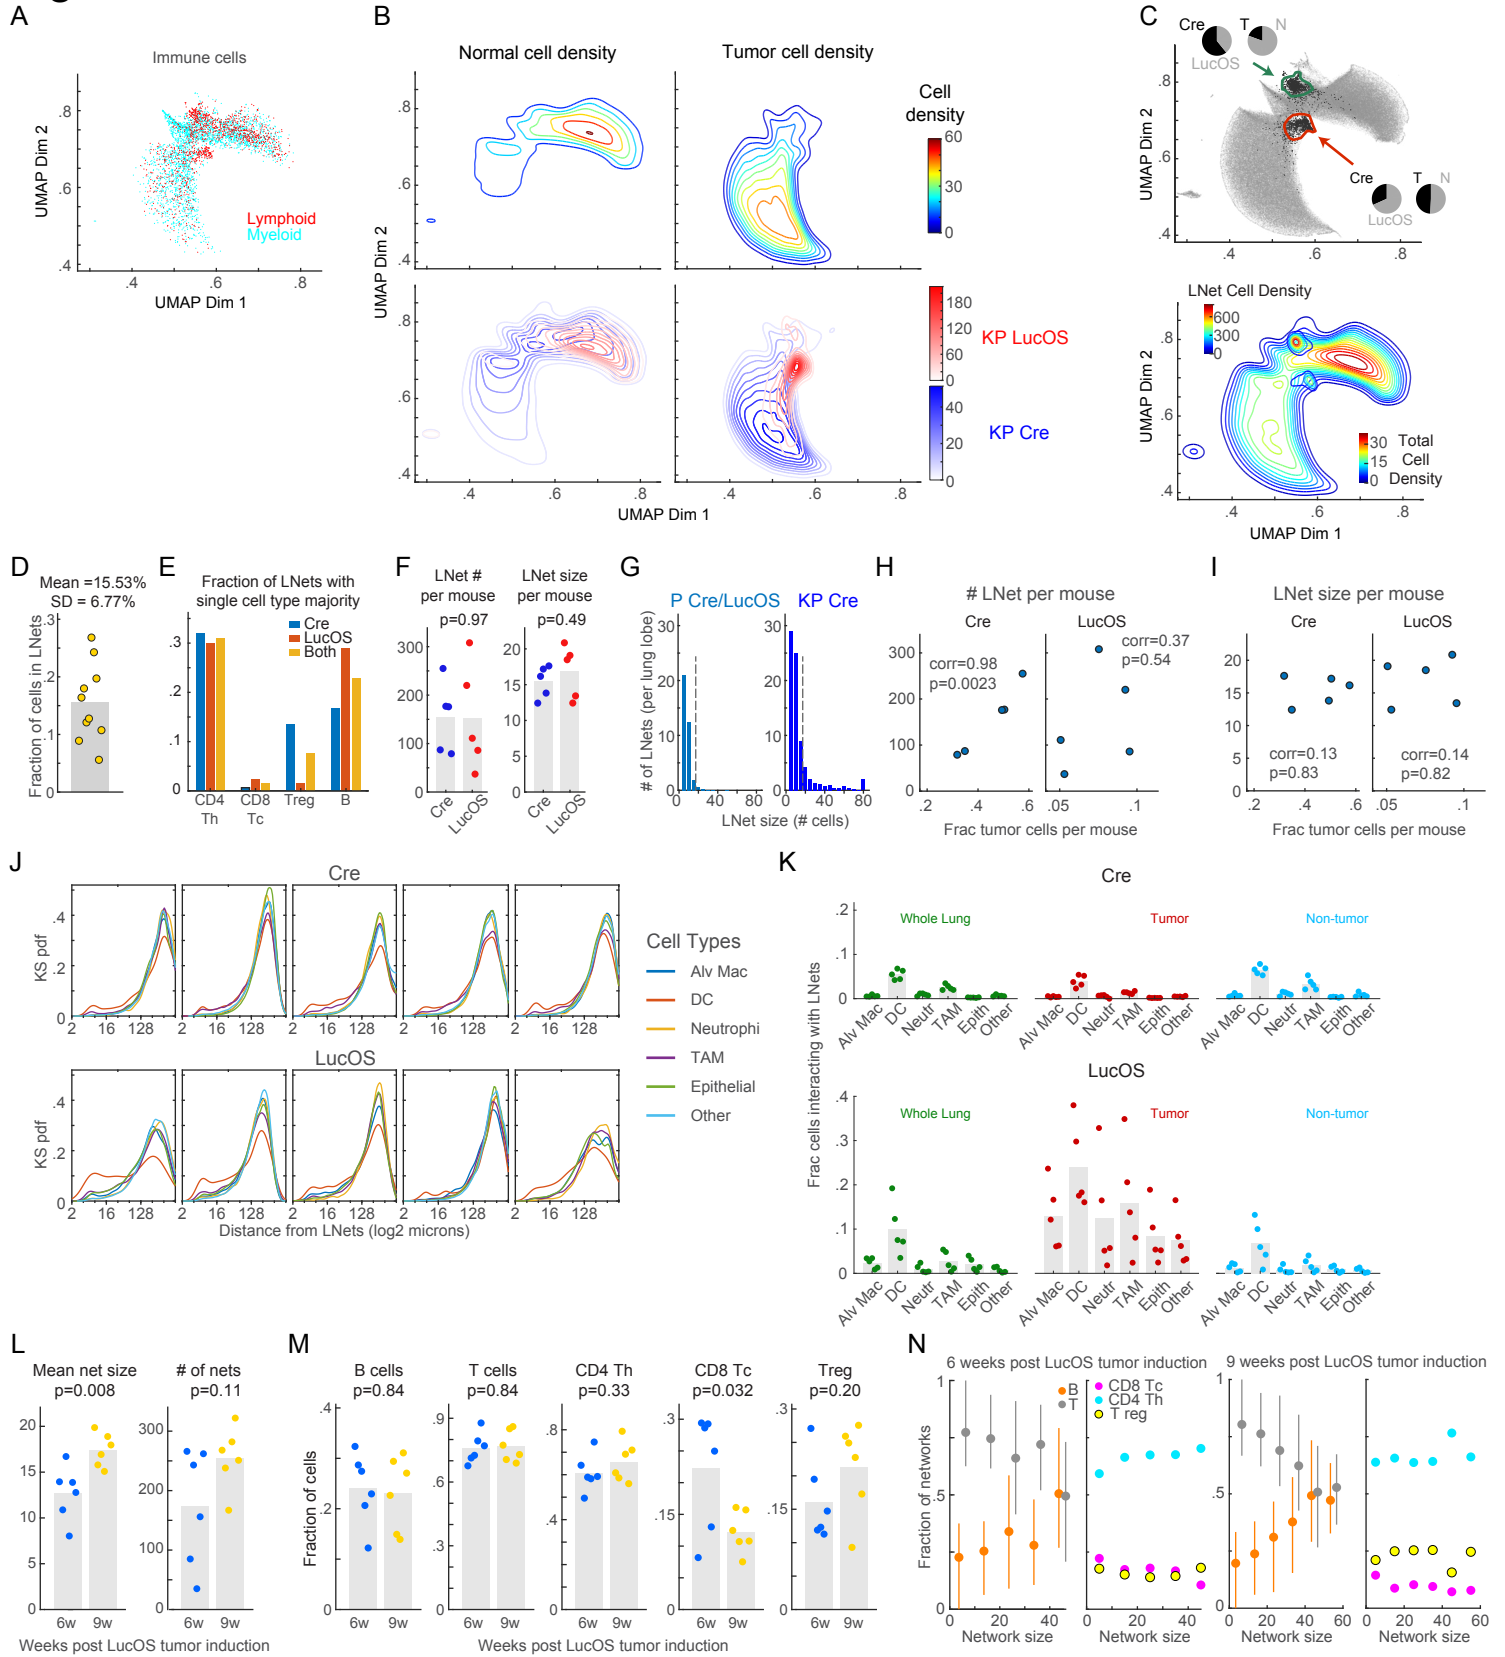



### Figure S3. Characterization of lymphocyte networks (Related to Figure 3)

(A) Neighborhood embedding generated by the Visinity algorithm displaying all cells. (B) Density plots of normal and tumor cells in Visinity embedding of KP LucOS and KP Cre lung tissue. Color key represents relative cell density. (C) Visinity plots, black dots are cells in lymphonets. Arrows indicate Visinity cluster enriched in lymphonets, and pie charts summarize the composition and fraction of each cluster derived from LucOS and Cre and from tumor and normal tissues. (D) Plot of fraction of cells in lymphonets for LucOS and Cre together (n = 10 mice, 5 per group, bar = mean). (E) Fraction of lymphonets with indicated single-cell type majority for LucOS, Cre, and both combined (n = 5 mice per group). (F) Bar graph of lymphonet number (left) and size (right) in KP Cre versus KP LucOS mice (n = 5 mice/group, bar=mean, two-tailed t-test). (G) Histogram of number of lymphonets per lung lobe by lymphonet size for P fl/fl mice (treated with Cre and LucOS lentiviruses which do not induce tumors due to lack of Kras allele and harvested 4 or 8 weeks later; n = 11 mice and 11 lung lobes; see Table S4 for details) and KP Cre mice (n = 5 mice and 10 lobes). Dashed line placed for comparative reference. (H-I) Scatter plot of (H) number of lymphonets and (I) average size of lymphonets per Cre and LucOS by fraction of tumor cells per mouse (n = 5 mice/group, Pearson correlation and two-tailed p-value). (J) Kernel estimate probability density functions of distance of indicated cell populations from lymphonets in KP Cre and KP LucOS lung tissue (separate plots for each mouse analyzed; n = 5 mice/group). (K) Bar graphs of fraction of cells per cell type interacting with lymphonets for indicated cell populations in Cre and LucOS lung tissue (for whole lung area, tumor area, and non-tumor area, n = 5 mice/group, bar=mean). (L) Bar graphs of mean lymphonet size and lymphonet number and (M) immune cell composition in KP LucOS mice 6 weeks and 9 weeks after tumor induction (n = 6 mice/group, bar=mean, two-tailed t-test). (N) Lymphonet composition across network sizes. Left, B and T cells; right, T cell subtypes for KP LucOS mice 6 weeks and 9 weeks after tumor induction (n = 6 mice/group, mean +/- 25<sup>th</sup> percentile).

# Figure S4

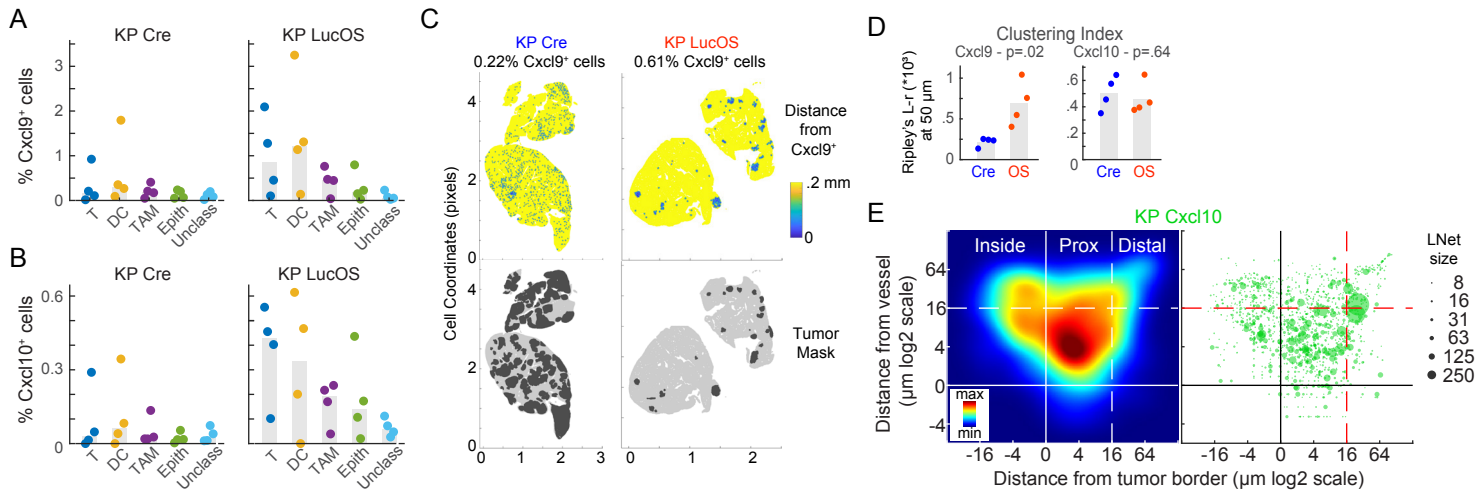

**Figure S4. Spatial analysis of *Cxcl10* overexpression on lymphonets (Related to Figure 4)**

(A) Bar plot of percent of *Cxcl9* expressing cells and *Cxcl10* expressing cells by cell type in KP Cre and KP LucOS lung tissues and (B) stacked bar graph showing fraction of positive cell per type in KP Cre and KP LucOS lung tissues (n = 4 mice/group mean  $\pm$  25<sup>th</sup> percentile). 'DC' = CD103<sup>+</sup> dendritic cells. (C) Map of all cells colored by distance to nearest *Cxcl9* mRNA positive cell measured by RNAScope™ *in situ* hybridization in KP Cre and KP LucOS lung tissue. (D) Spatial autocorrelation of *Cxcl9* and *Cxcl10* mRNA-expressing cells using Ripley's L function ('Ripley's clustering index') in KP Cre and KP LucOS mice (n = 4 mice/group, bar = mean). (E) Left, density plots of lymphonets by distance from closest blood vessel (y-axis) and tumor (x-axis) for KP *Cxcl10* cohort. Color key represents relative lymphonet density. Right, scatter plot lymphonets used to generate density plot (dot size represents the lymphonet size, n = 4 mice).



**Figure S5. Multiparametric analysis of Tc functional states after anti-PD-1/anti-CTLA-4 immune checkpoint blockade (ICB) (Related to Figure 5)**

(A) Schematic of treatment of KP LucOS mice with a SIIN and SIY long-peptide vaccine or anti-PD-1/anti-CTLA-4 immune checkpoint blockade therapy. (B) Bar graphs of total number of tumors (left), percent of tumor area cells (center), and percent epithelial cells (right) normalized by total cells for KP LucOS mice control (n = 7 mice) and with vax treatment (n = 8 mice). Vax treatment resulted in a significant reduction of tumor burden when immune cell infiltrate was excluded from tumor area calculations (bar=mean, two-tailed t-test). (C) Bar graphs of total number of tumors (left), percent of tumor area cells (center), and percent epithelial cells (right) normalized by total cells for KP LucOS mice control (n = 6 mice) and with immune checkpoint blockade (ICB) treatment (n = 6 mice, bar=mean, two-tailed t-test). (D) Palantir projection of CD8 Tc populations in KP LucOS mice treated with anti-PD-1/anti-CTLA-4 immune checkpoint blockade (ICB) or isotype control antibodies (Ctrl) (n = 10<sup>4</sup> cells sampled from n = 6 mice per treatment, see panel A for treatment schematic). The expression levels of the indicated markers are mapped to color (normalized between 0.1 and 99<sup>th</sup> percentile). Tc states defined by multiparameter measurements are indicated at the extremes of the representation (S1, S2, and S3) connected by transitional phenotypes (T1-T3) shown in the schematic to the right. (E) Plot of the normalized fluorescence units for each of the markers in the indicated Tc cell states and transitions (mean ± 25<sup>th</sup> percentile). (F) Heat map of Tc cell densities in Palantir projections for Ctrl and ICB groups (n = 10<sup>4</sup> cells per group). Right, stacked bar graph of the fraction of Tc cells in each state and transition. (G) Heat map of Tc cell densities in Palantir plots for KP LucOS following PBS treatment (Ctrl, vaccine cohort) separated by distance from tumor boundary (distal: >50 μm from the tumor boundary; proximal: <50 μm from the tumor boundary; and inside tumor, n = 10<sup>4</sup> cells). (H) Heat map of Tc densities in Palantir projections for KP LucOS mice following Ctrl or ICB treatment separated by distance from tumor boundary as in G (n = 10<sup>4</sup> cells per treatment). (I) Frequency of Tc cell states and transitions from tumor boundaries in ICB cohort. (J) Plot of the percent of Tc cells that are TCF1<sup>+</sup> PD-1<sup>+</sup> in each Tc cell state in ICB cohort. (K, L) Graph of flow cytometric analysis of dissociated tumor-bearing lung tissue from KP LucOS mice treated with Vax (K) or ICB (L) showing the percent of CD8

T cells expressing the indicated markers and the proportion of these populations that are SIIN and SIY peptide-MHC Tetramer+ versus Tetramer- (mean + SD, n = 5-7 mice per group; p-value \*p<0.05, \*\*p<0.01, \*\*\*p<10<sup>-3</sup>, \*\*\*\*p<10<sup>-4</sup>). Peptide-MHC tetramers do not fully capture low affinity TCR interactions, and some Tetramer negative cells analyzed may also be specific to the SIIN and SIY antigens.

# Figure S6

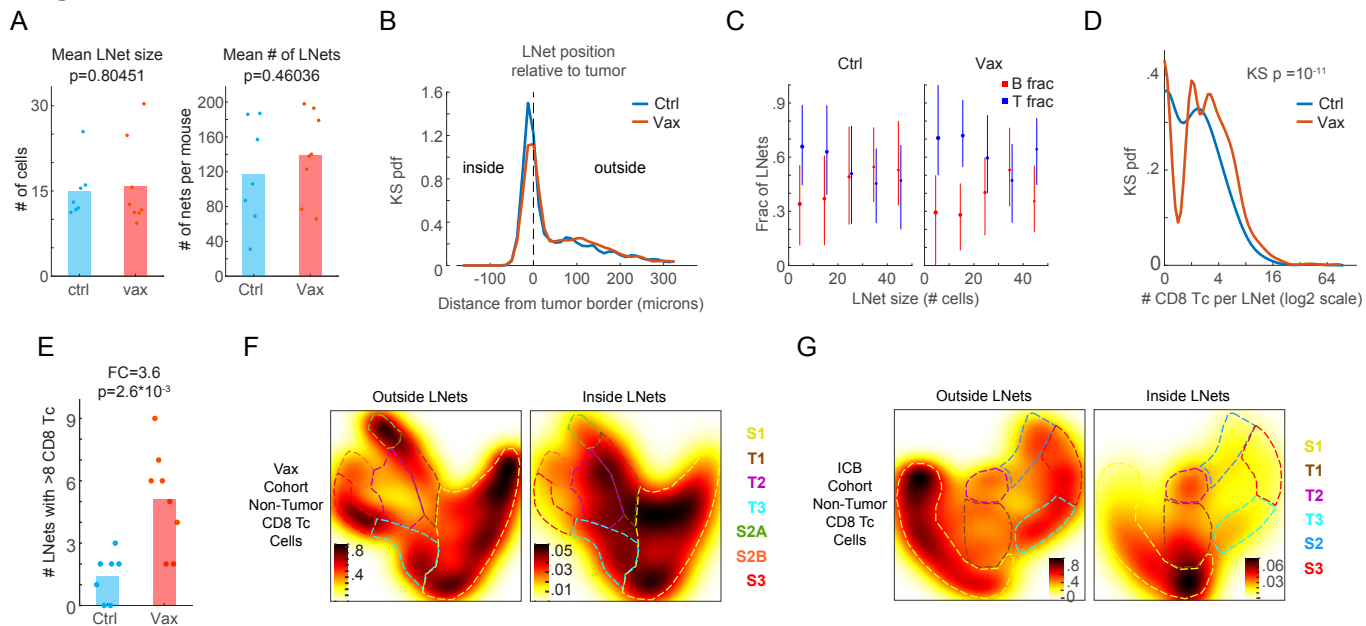

**Figure S6. Characterization of lymphonets after vaccine and immune checkpoint blockade immunotherapies (Related to Figure 6)**

(A) Plot of the number of cells in lymphonets and the average number of lymphonets in KP LucOS mice without treatment (Ctrl) or treated with vaccination (Vax) (n = 7 and 8 mice, bar=mean, two-tailed t-test). (B) Kernel density probability density function of lymphonet spatial frequency relative to the tumor boundary for Ctrl (n = 7) and Vax (n = 8) mice. (C) Plot of the fraction of lymphonets comprised of T and B cells as a function of lymphonet size in Ctrl and Vax mice (mean +/- 25<sup>th</sup> percentile). (D) Kernel density probability density function of number of CD8 cytotoxic T cells per lymphonet for Ctrl (n = 7) and Vax (n = 8) mice (two-tailed KS test). (E) Bar graph of the number of lymphonets with >8 CD8 Tc cells in Ctrl (n = 7) and Vax (n = 8) mice (FC = fold change, two-tailed t-test) (F-G) Heat map of cell densities of non-tumor Tc cells present outside and inside lymphonets in Palantir projections for Vax (F, n = 14,480 and 978 cells) and ICB-treated (G, n = 13,948 and 735 cells) cohorts.



**Table S3: Human samples information (Related to Figure 7)**

| Case | Age (yrs) | Sex | Pathology           | AJCC 8th Edition Stage | Size (cm) | Side  | Site       | Histologic type       | Grade                         | Treatment |
|------|-----------|-----|---------------------|------------------------|-----------|-------|------------|-----------------------|-------------------------------|-----------|
| 1    | 68        | F   | Lung Adenocarcinoma | pT1b pNx               | 1.3       | Right | Lower lobe | acinar predominant    | G2: Moderately differentiated | None      |
| 2    | 56        | F   | Lung Adenocarcinoma | pT1cN2                 | 2.3       | Left  | Upper lobe | solid predominant     | G3: Poorly differentiated     | None      |
| 3    | 60        | M   | Lung Adenocarcinoma | pT1bN0                 | 1.4       | Right | Lower lobe | acinar predominant    | G3: Poorly differentiated     | None      |
| 4    | 66        | M   | Lung Adenocarcinoma | pT2a pN0               | 2.2       | Left  | Upper lobe | acinar predominant    | G2: Moderately differentiated | None      |
| 5    | 73        | F   | Lung Adenocarcinoma | pT2a pN0               | 2.2       | Left  | Upper lobe | solid predominant     | G3: Poorly differentiated     | None      |
| 6    | 73        | F   | Lung Adenocarcinoma | pT1a pN0               | 1         | Right | Lower lobe | acinar predominant    | G2: Moderately differentiated | None      |
| 7    | 73        | M   | Lung Adenocarcinoma | pT1cpN0                | 2.2       | Left  | Upper lobe | acinar predominant    | G2: Moderately differentiated | None      |
| 8    | 63        | F   | Lung Adenocarcinoma | pT1bN0                 | 1.2       | Right | Upper lobe | papillary predominant | G2: Moderately differentiated | None      |
| 9    | 79        | M   | Lung Adenocarcinoma | pT2a pN0               | 2.1       | Left  | Upper lobe | acinar predominant    | G2: Moderately differentiated | None      |
| 10   | 53        | F   | Lung Adenocarcinoma | pT3pN2                 | 1.9       | Right | Upper lobe | solid predominant     | G3: Poorly differentiated     | None      |
| 11   | 66        | F   | Lung Adenocarcinoma | pT1bN0                 | 1.7       | Right | Lower lobe | acinar predominant    | G2: Moderately differentiated | None      |
| 12   | 66        | F   | Lung Adenocarcinoma | pT1bN0                 | 1.3       | Left  | Lower lobe | papillary predominant | G2: Moderately differentiated | None      |
| 13   | 59        | M   | Lung Adenocarcinoma | PT3N0M1b               | 2         | Right | Upper lobe | solid predominant     | G3: Poorly differentiated     | None      |
| 14   | 70        | F   | Lung Adenocarcinoma | PT1cN0                 | 2.9       | Right | Upper lobe | acinar predominant    | G2: Moderately differentiated | None      |

# Figure S7

A

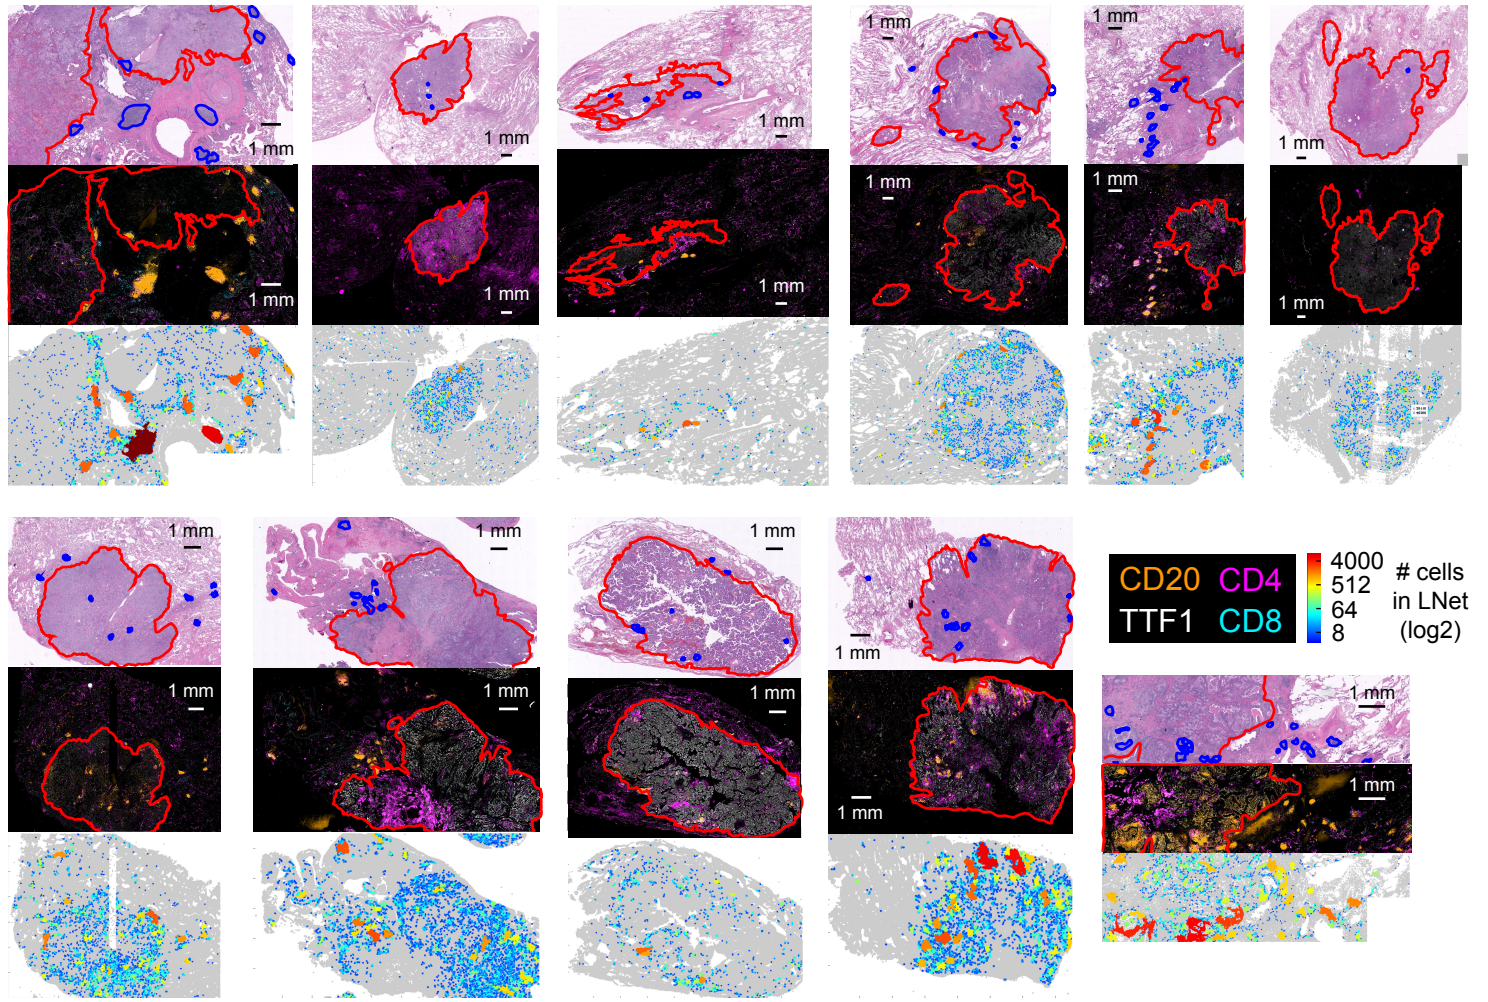

B

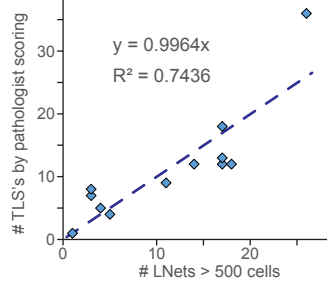

C

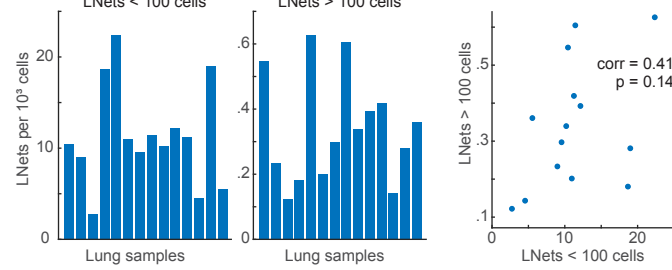

D

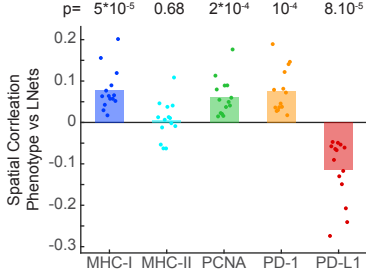

E

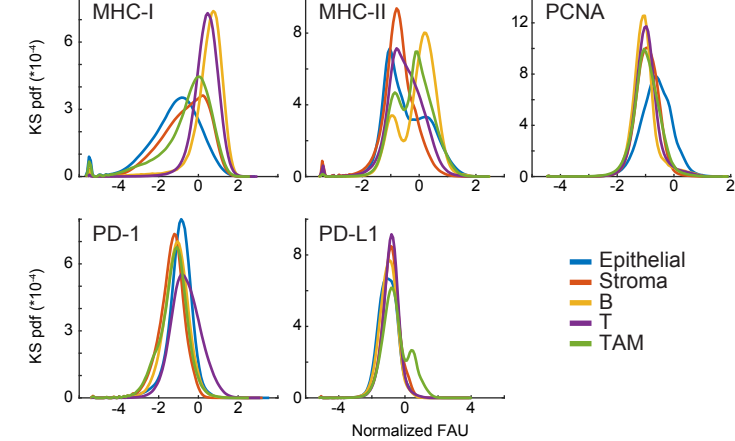

**Figure S7. Analysis of early-stage human lung adenocarcinoma (Related to Figure 7)**

(A) Representative images of H&E and CyCIF images of human lung adenocarcinoma (Table S2; tumor areas outlined in red and lymphonets outlined in blue. Color map indicates lymphonet size. Scale bar: 1mm. (B) Scatter plot of number of TLS identified by pathology review versus number of large lymphonets (defined as >500 cells) in human lung tumor samples. Dashed lined linear regression from origin. (C) Bar graph and scatter plot of number of lymphonets per sample normalized by number of total cells in sample. Left, lymphonets <100 cells, right, lymphonets >100 cells. Pearson correlation and two-tailed test. (D) Spatial correlation of lymphocytes' likelihood of belonging to a lymphonet and the likelihood of myeloid cells expressing the indicated markers (n =1 4 samples, bar = mean, Pearson correlation and two-tailed test). (E) Kernel density probability density function of marker expression in indicated cell types.

**Table S4: Lymphonets and Tertiary Structures in Human Lung Adenocarcinoma (Related to Figure 7)**

| CASE | Lymphonet number by size |       |       |        |      | TLS<br>(manual<br>annotation) |
|------|--------------------------|-------|-------|--------|------|-------------------------------|
|      | < 10 cells               | 11-30 | 31-64 | 65-500 | >500 |                               |
| 1    | 1168                     | 642   | 112   | 112    | 36   | n/a                           |
| 2    | 1132                     | 450   | 80    | 61     | 14   | 12                            |
| 3    | 308                      | 161   | 36    | 30     | 4    | 5                             |
| 4    | 2385                     | 988   | 109   | 69     | 3    | 7                             |
| 5    | 2713                     | 1232  | 219   | 152    | 17   | 12                            |
| 6    | 1315                     | 610   | 112   | 62     | 5    | 4                             |
| 7    | 1100                     | 537   | 124   | 95     | 1    | 1                             |
| 8    | 1293                     | 672   | 148   | 132    | 26   | 36                            |
| 9    | 1184                     | 584   | 118   | 83     | 17   | 18                            |
| 10   | 1302                     | 752   | 186   | 113    | 11   | 9                             |
| 11   | 1260                     | 679   | 143   | 100    | 18   | 12                            |
| 12   | 502                      | 279   | 59    | 41     | 3    | 8                             |
| 13   | 2149                     | 1180  | 202   | 86     | 17   | 13                            |
| 14   | 580                      | 366   | 74    | 75     | 18   | 40                            |
